# Supplementary material for: Conductive metal–organic framework nanowire arrays for electrocatalytic oxygen evolution
Source: Royal Society of Chemistry journal article supplement (doi:10.1039/c9ta02169h), 2019-01-01
Supplement: c9ta02169h1.pdf [file c9ta02169h1.pdf]

---

# **Conductive Metal–Organic Framework Nanowires Array for Electrocatalytic Oxygen Evolution**

Wen-Hua Li, Jiangquan Lv, Qiaohong Li, Jiafang Xie, Naoki Ogiwara , Yiyin Huang, Huijie Jiang, Hiroshi Kitagawa, Gang Xu\* and Yaobing Wang\*

## **Table of Contents**

- 1. Supplementary Figures.**
- 2. Supplementary Tables.**
- 3. Supplementary References.**

## 1. Supplementary Figures:

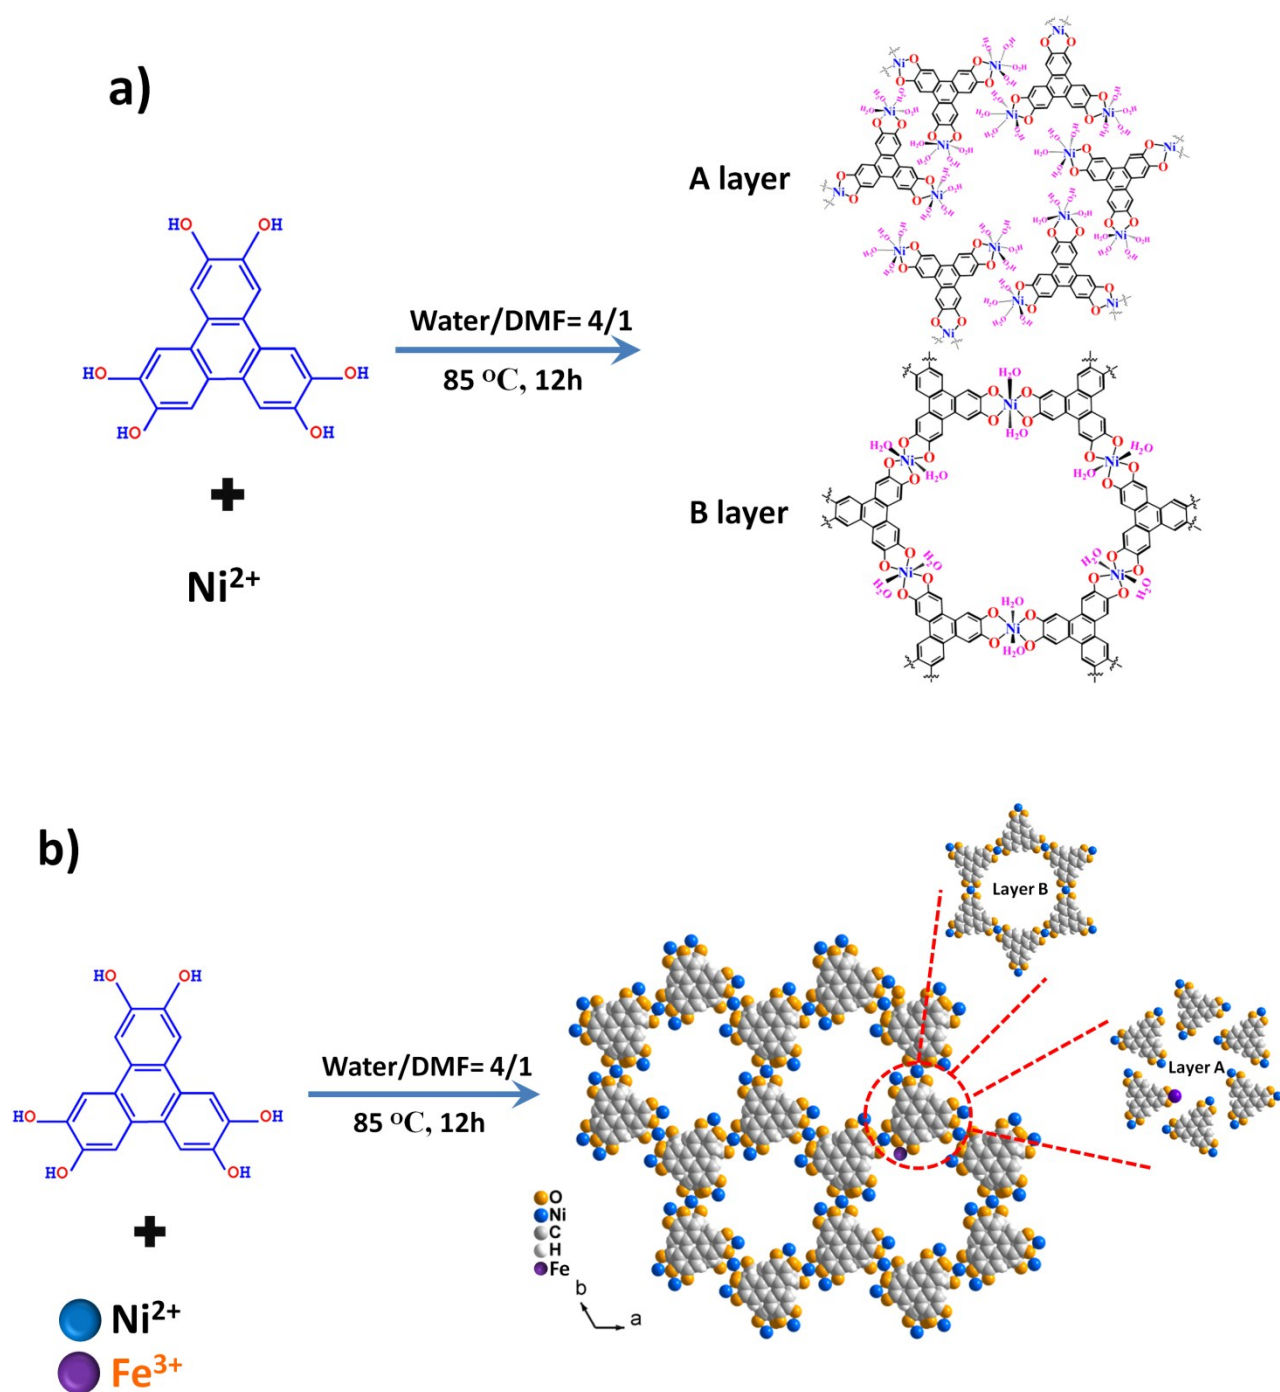

**Figure S1.** a) The scheme of hydrothermal method to synthesis Ni-HHTP. A layer is discrete layer and B layer is continuous layer. b) Scheme for the synthesis of FexNiy-HHTP.

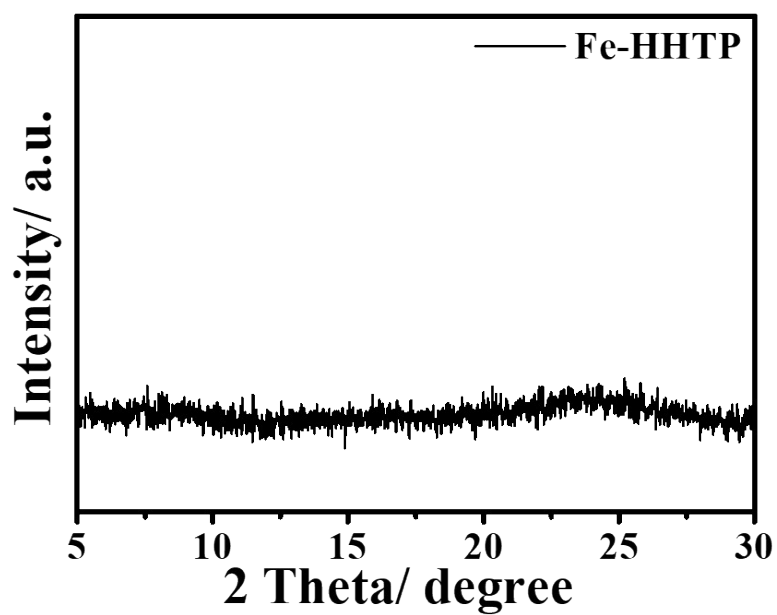

**Figure S2.** The PXRD pattern for Fe-HHTP powder shows an amorphous phase, which indicates that Fe-HHTP MOF structure cannot be achieved under the condition applied in the manuscript.

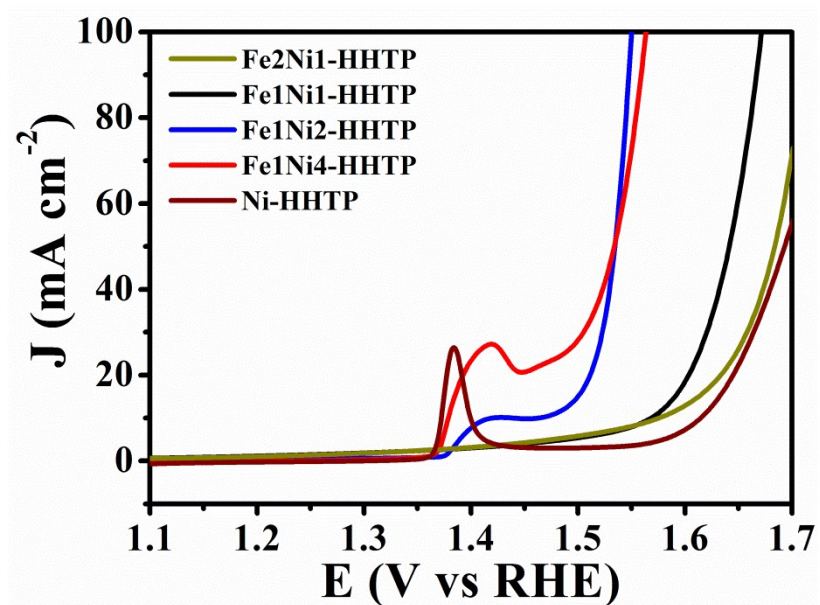

**Figure S3.** LSV curves of Ni-HHTP, Fe1Ni4-HHTP, Fe1Ni2-HHTP, Fe1Ni1-HHTP, Fe2Ni1-HHTP in 1 M KOH.

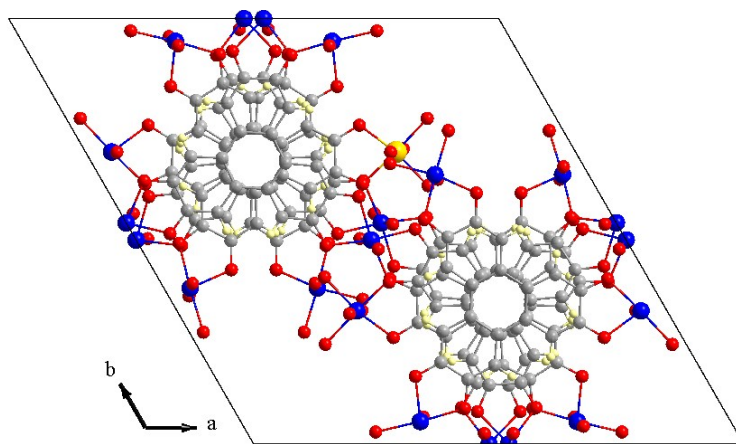

**Figure S4.** A possible unit cell of Fe<sub>1</sub>Ni<sub>4</sub>-HHTP, which is almost the same as Ni-HHTP except one Ni was substitute by one Fe in the discrete layer. A and B layer stacked in sequence and are crystallized in the trigonal space group of  $P\bar{3}c1$  (Blue atom for Ni, yellow atom for Fe, grey atom for carbon, light yellow atom for hydrogen).

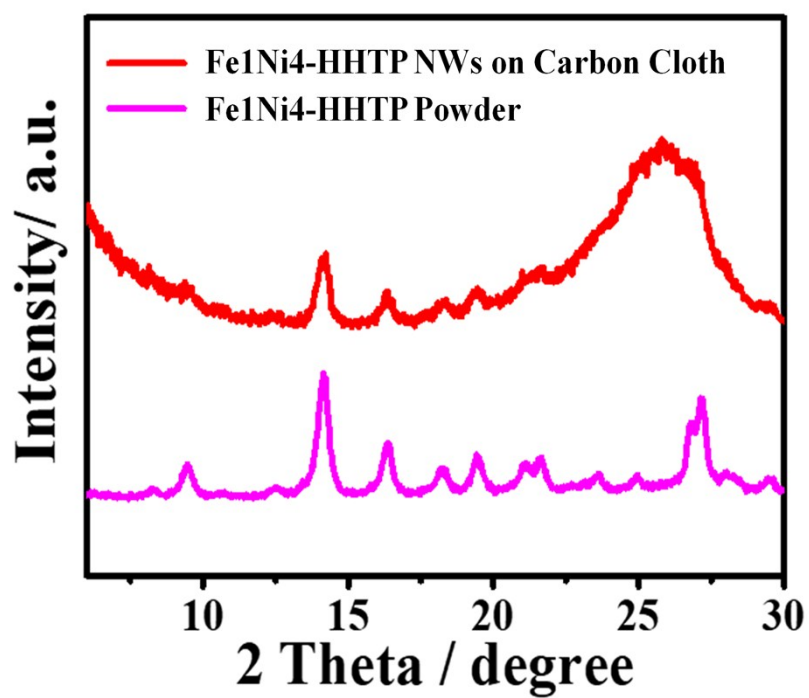

**Figure S5.** PXRD patterns for Fe<sub>1</sub>Ni<sub>4</sub>-HHTP powder and Fe<sub>1</sub>Ni<sub>4</sub>-HHTP NWs on carbon cloth. The matching peaks of two patterns demonstrate the successful synthesis of FeNi-HHTP on carbon cloth. (The broad peak in red line belongs to the carbon clothes substrate)

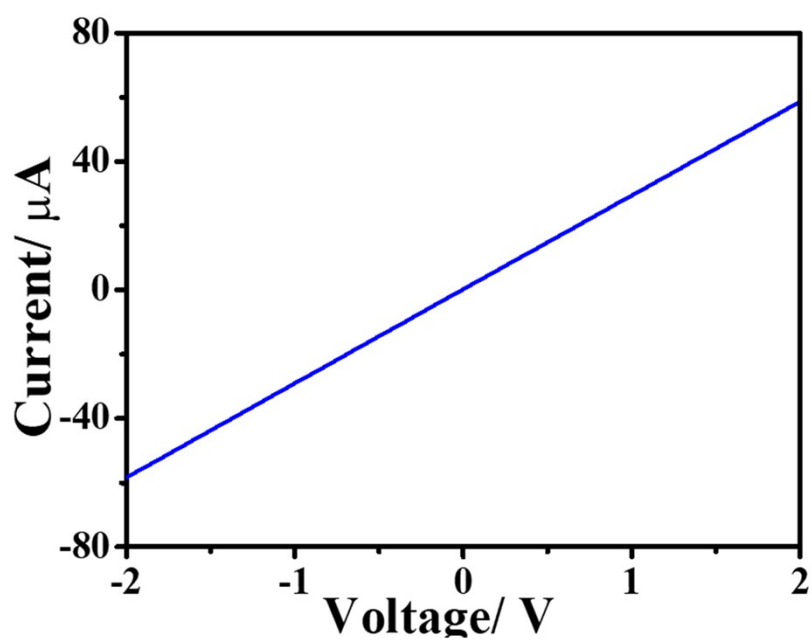

**Figure S6.** Electrical measurements of Ni-HHTP were performed using two-electrode in air at a constant temperature of 297 K and in the absence of light. The electrical conductivity is calculated to be  $3.03 \times 10^{-5} \text{ S cm}^{-1}$ . ( $\sigma = L/(R \times \pi(d/2)^2)$ ,  $L = 0.50 \text{ mm}$ ,  $d = 2.5 \text{ mm}$ ,  $R = 3.3 \times 10^4 \Omega$ ).

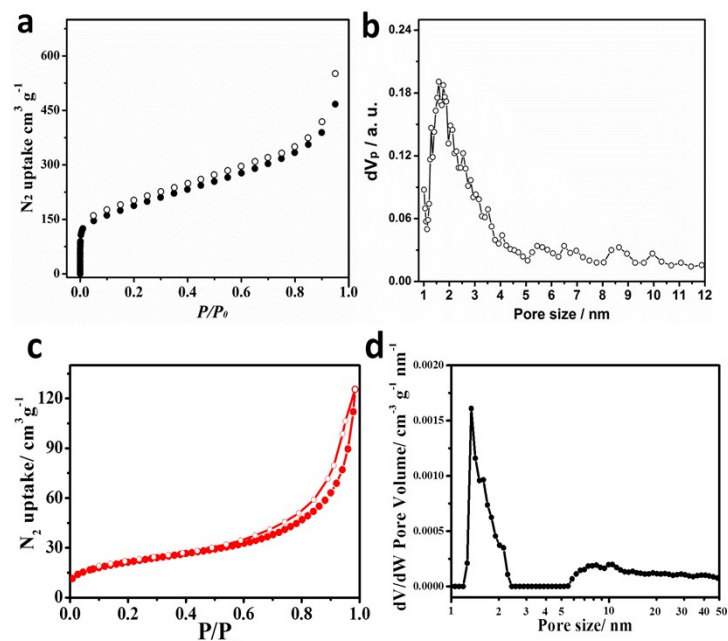

**Figure S7.** (a, b) N<sub>2</sub> sorption isotherms and pore size distribution (from NLDFT fitting) of Ni-HHTP at 77 K. (c, d) N<sub>2</sub> sorption isotherms and pore size distribution (from NLDFT fitting) of Fe<sub>1</sub>Ni<sub>4</sub>-HHTP at 77 K.



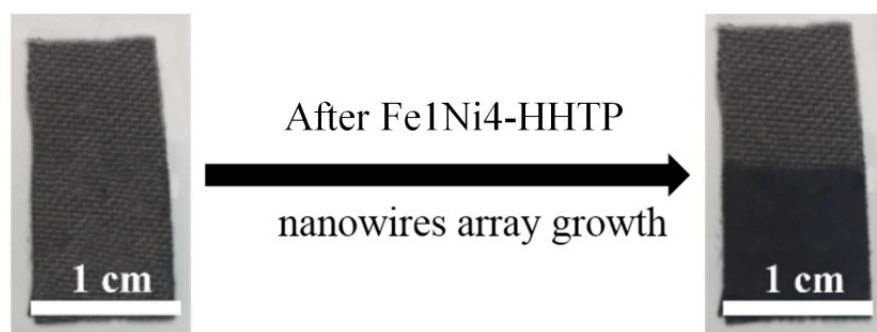

**Figure S8.** The obvious change on carbon cloth from grey to dark blue after the growth of Fe1Ni4-HHTP nanowires array with controlled  $1 \times 1 \text{ cm}^2$ .

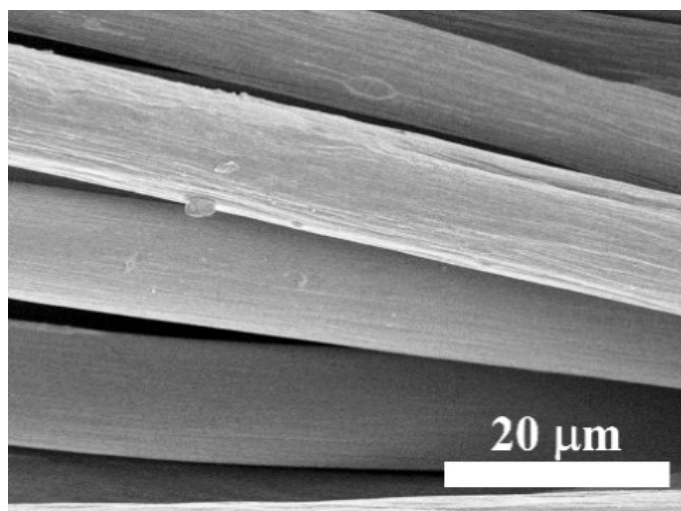

**Figure S9.** SEM image of bare carbon cloth shows smooth surfaces.

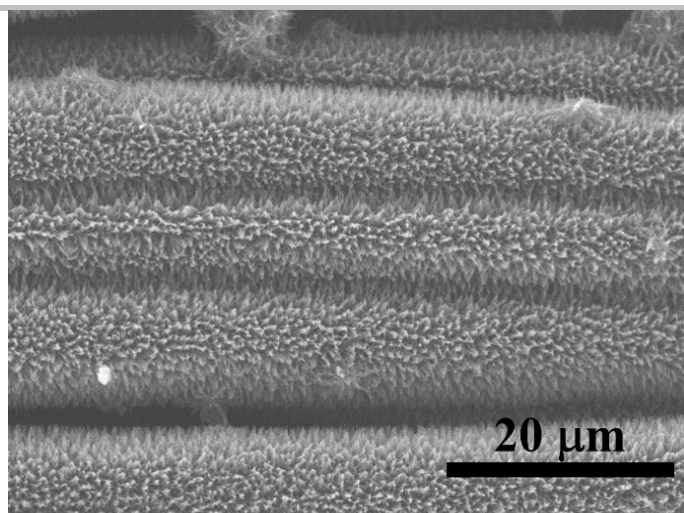

**Figure S10.** SEM images of the Fe<sub>1</sub>Ni<sub>4</sub>-HHTP nanowires array growing on carbon cloth.

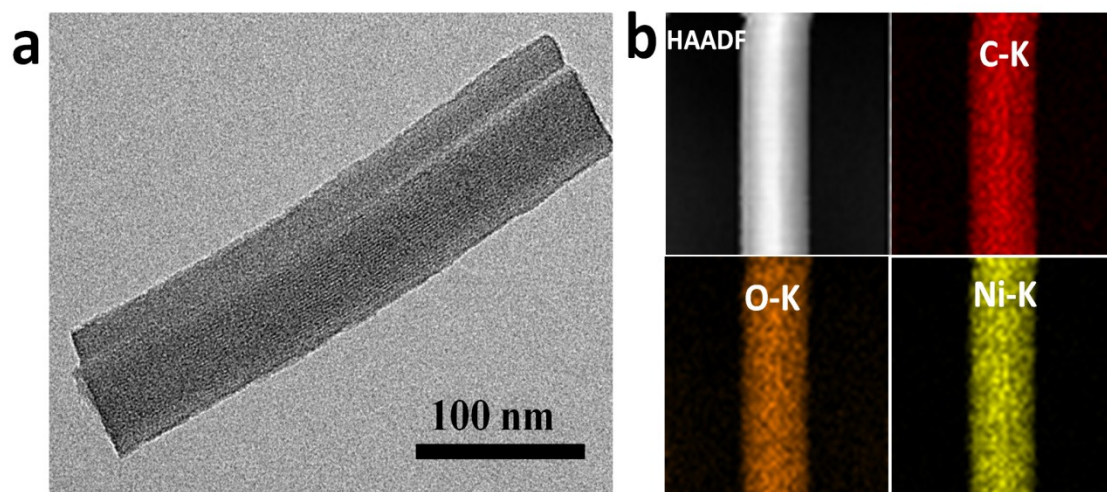

**Figure S11.** (a) HRTEM of Ni-HHTP nanowire; (b) HAADF-STEM image and corresponding C-K, O-K, Ni-K, STEM-EDX map in Ni-HHTP nanowires .

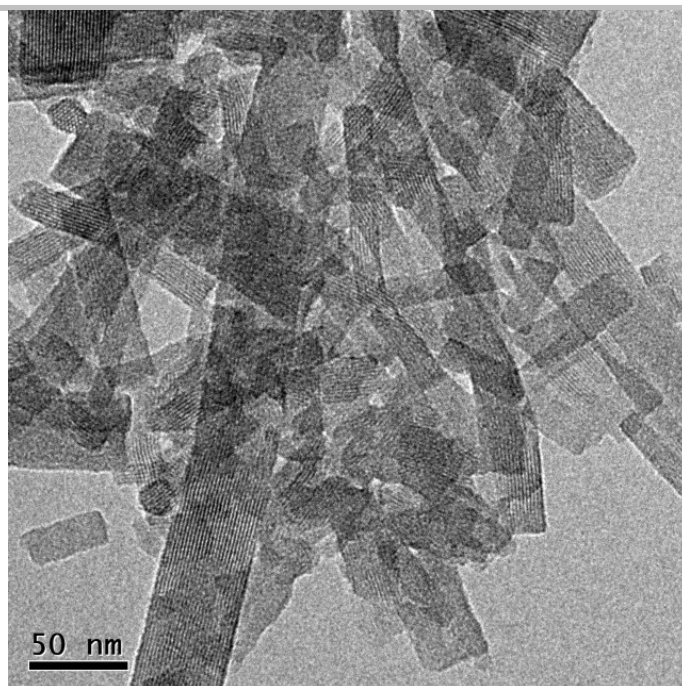

**Figure S12.** HRTEM image of Fe<sub>1</sub>Ni<sub>4</sub>-HHTP nanowires array

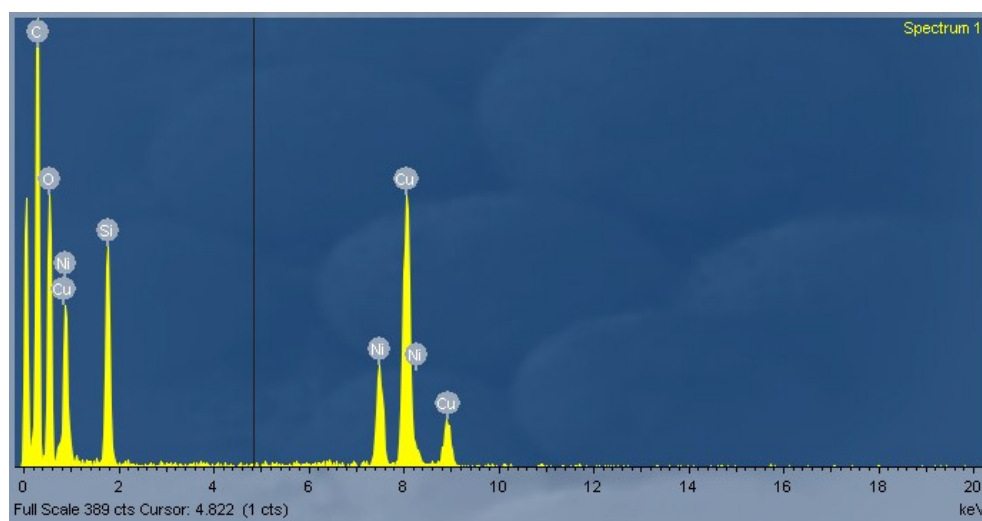

**Figure S13.** EDS spectrum of Ni-HHTP nanowires array.

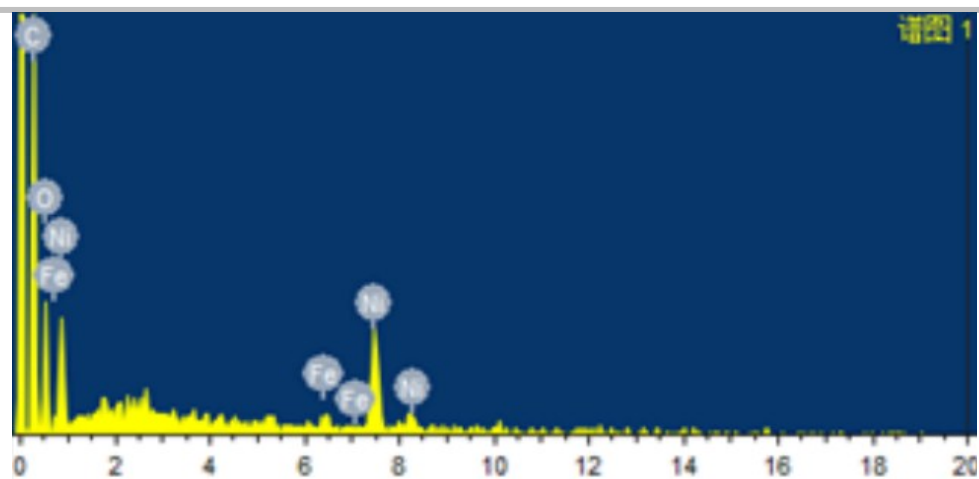

**Figure S14.** EDS spectrum of Fe<sub>1</sub>Ni<sub>4</sub>-HHTP nanowires array.

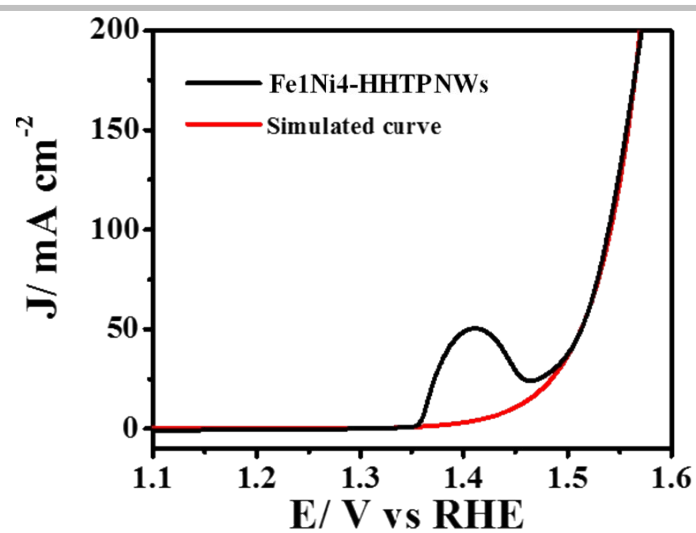

**Figure S15.** LSV curve of Fe1Ni4-HHTP NWs (black line) and the corresponding simulated curve (red line) to obtain overpotential of 213 mV at  $10 \text{ mA cm}^{-2}$ .



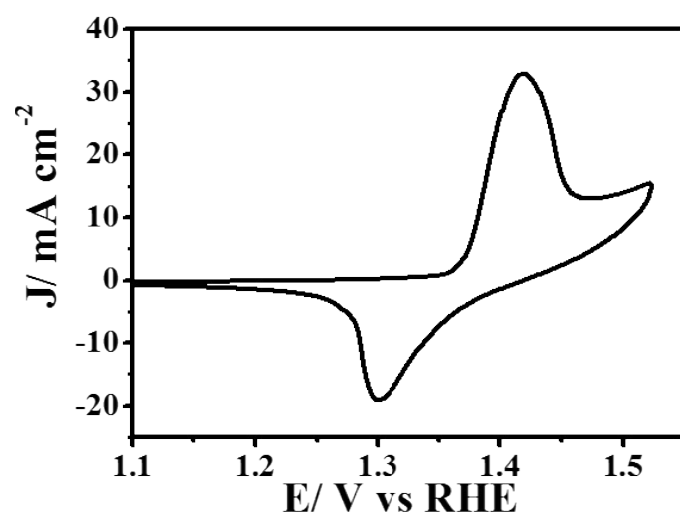

**Figure S16.** CV of Fe1Ni4-HHTP NWs, which showed a characteristic  $\text{Ni}^{2+}/^{3+}$  redox couple

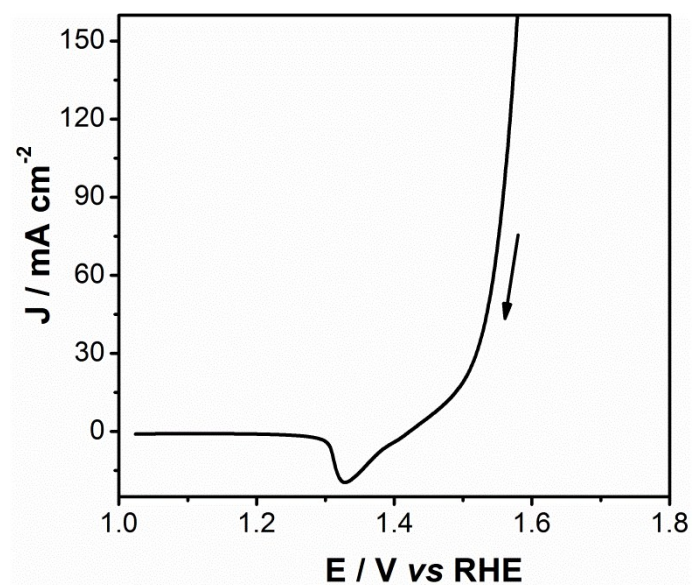

**Figure S17** The LSV curve of Fe<sub>1</sub>Ni<sub>4</sub>-HHTP NWs at a reversed scan direction in 1M KOH.(Scan rate: 10 mV s<sup>-1</sup>)

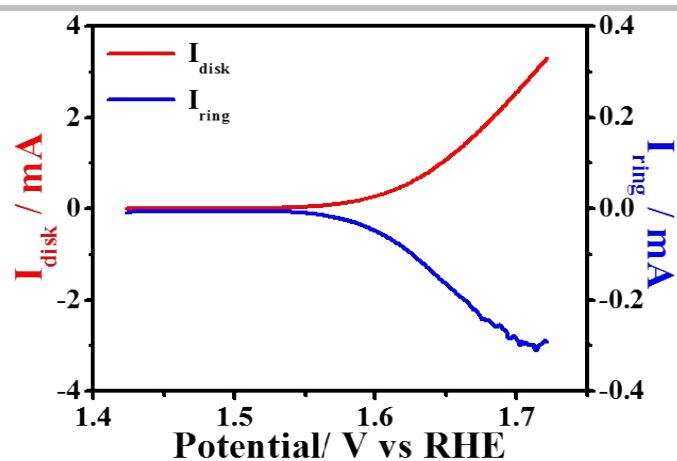

**Figure S18.** Faraday efficiency testing of Fe1Ni4-HHTP NWs using the RRDE technique in  $\text{N}_2$ -saturated 1 M KOH solution. Faradaic efficiency measurements were calculated at  $I_d = 0.2$  mA, and the corresponding FE=98.1%.

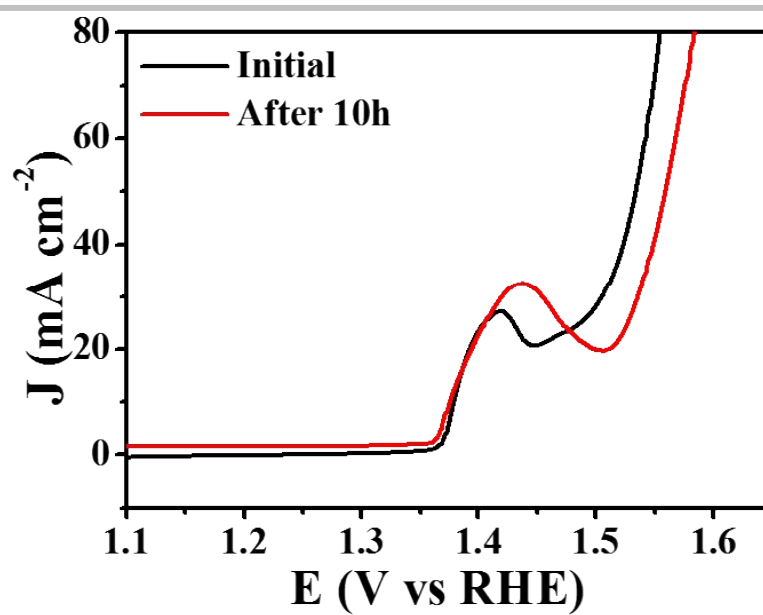

**Figure S19.** LSV curves of Fe<sub>1</sub>Ni<sub>4</sub>-HHTP NWs *in situ* grown on carbon cloth before and after 10 h durability test at 30 mA cm<sup>-2</sup>.

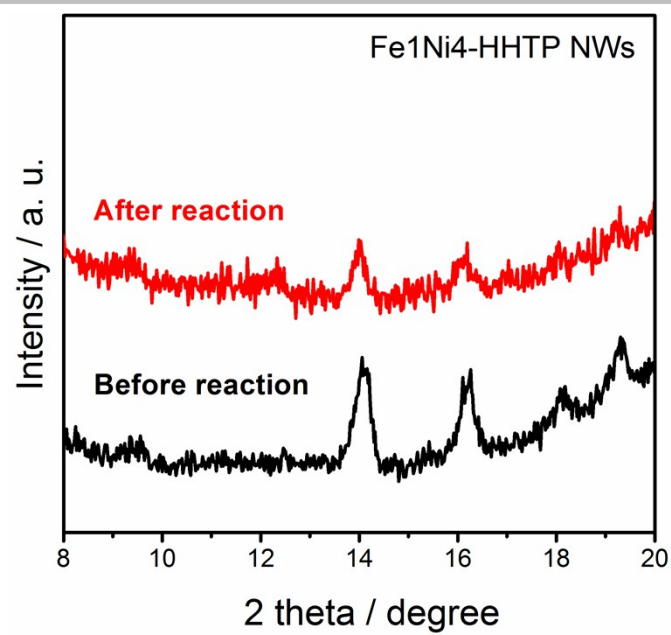

**Figure S20.** PXRD patterns of Fe<sub>1</sub>Ni<sub>4</sub>-HHTP NWs before and after OER process.

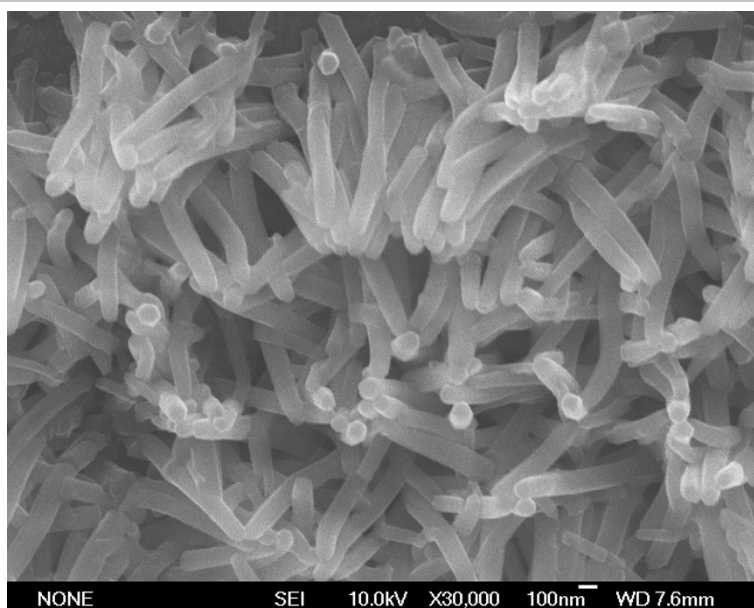

**Figure S21.** SEM image of Fe<sub>1</sub>Ni<sub>4</sub>-HHTP NWs after OER process.

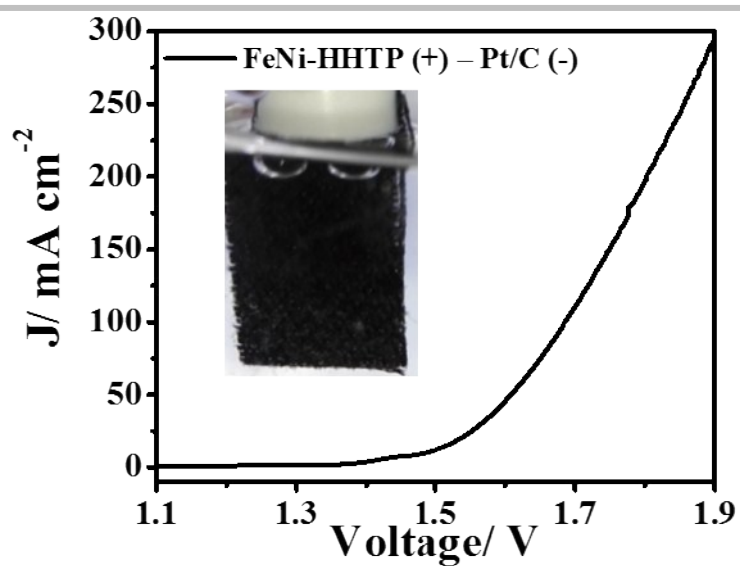

**Figure S22.** Steady-state polarization curves for overall water splitting of Fe<sub>1</sub>Ni<sub>4</sub>-HHTP NWs and Pt/C in a two-electrode configuration (Inset: the photograph shows the evolution of oxygen gas bubbles).

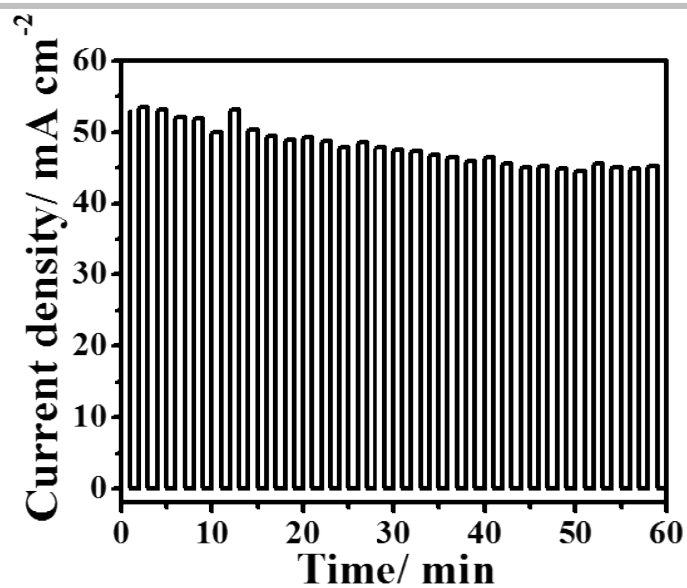

**Figure S23.** The measured current density during the solar cell driven overall water splitting under chopped simulated sunlight (AM 1.5G), the data were recorded for the time period of 1h. The solar-to-hydrogen conversion efficiency ( $\eta_{\text{SHE}}$ ) was determined by coupling the electricity-to-hydrogen efficiency ( $\eta_{\text{elec}}$ ) with solar cell efficiency ( $\eta_{\text{solar}}$ ), reaching up to 9.2% using Fe1Ni4-HHTP NWs as anode



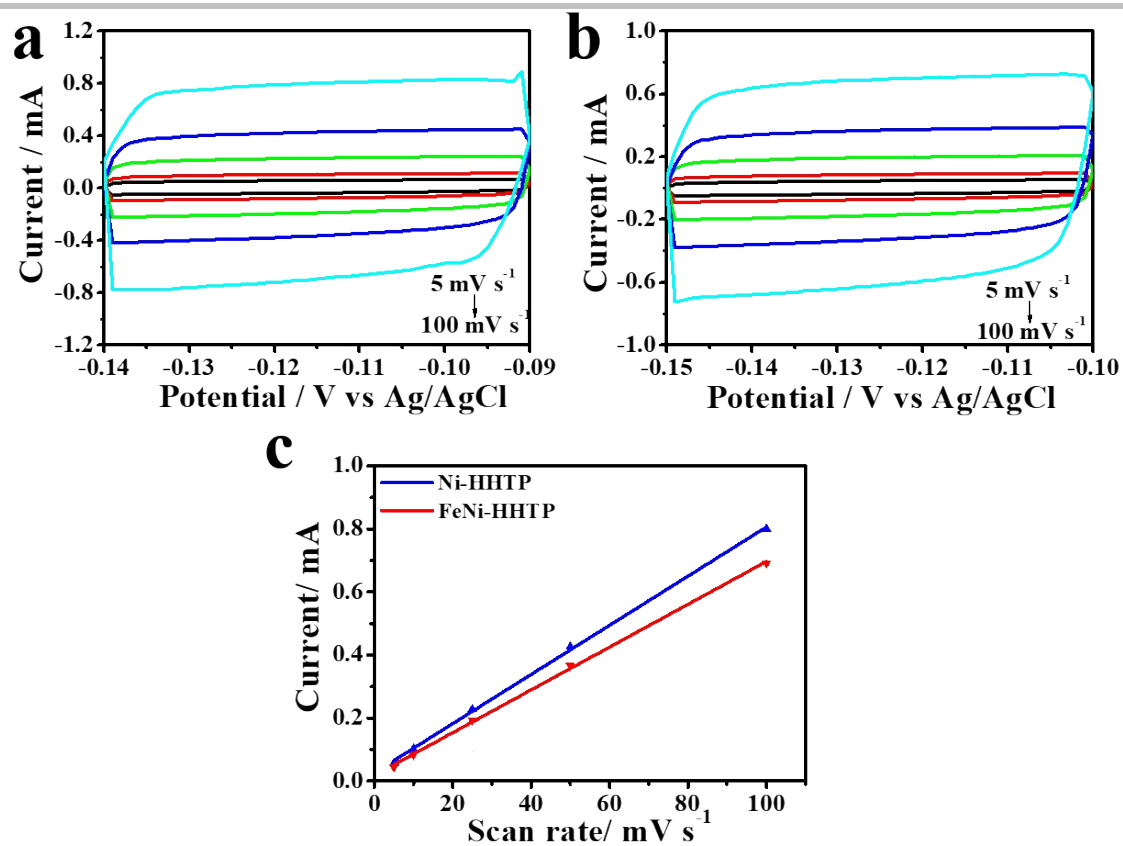

**Figure S24.** CV curves of (a) Ni-HHTP NWs and (b) Fe1Ni4-HHTP NWs were measured in a non-Faradaic region at the following scan rates: 5, 10, 25, 50 and 100  $\text{mV s}^{-1}$ ; (c) the corresponding figure for the differences in current density variation plotted against scan rate fitted to a linear regression enables the estimation of  $C_d$ .

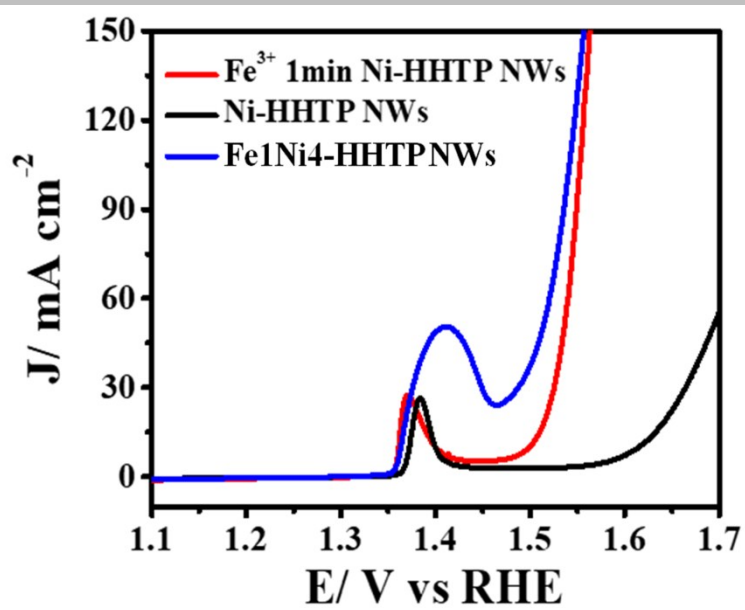

**Figure S25.** LSV curves of Ni-HHTP NWs, Fe1Ni4-HHTP NWs and Ni-HHTP dipping in  $\text{Fe}^{3+}$  solution for 1 min (wash several times before test).

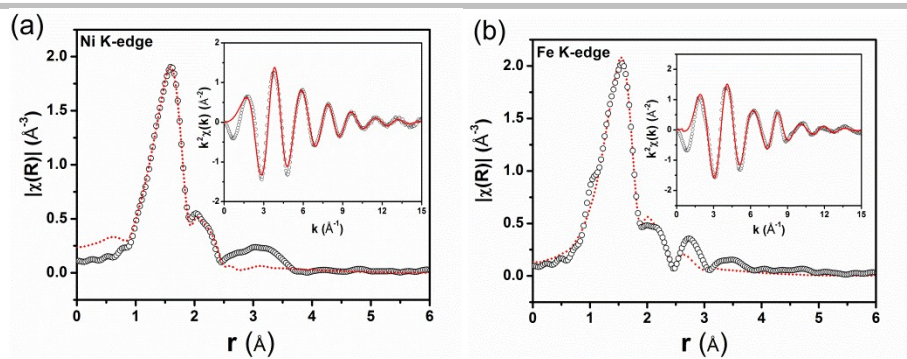

**Figure S26.** RDF of Fe1Ni4-HHTP (black circle) and fitting (red line).

---

**$T_{2g}$ -like  $\pi^*$**

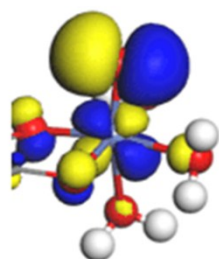

**NiO<sub>6</sub>**

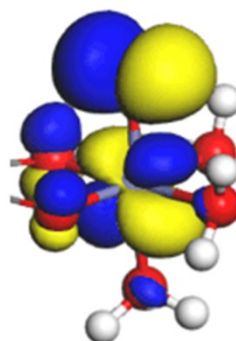

**FeO<sub>6</sub>**

**FigureS27.** Computed LUMO for Fe1Ni4-HHTP and Ni-HHTP electrocatalysts respectively.

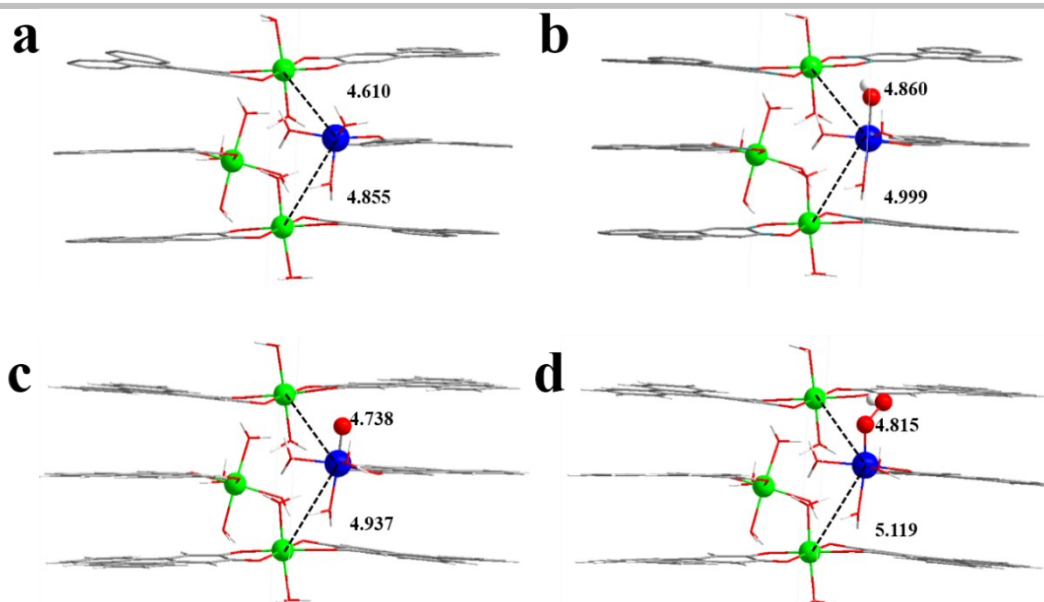

**Figure S28.** The relative distance of Fe active site and two neighbor layer Ni during different OER processes of (a) Fe\* vacancy; (b) OH\* absorption; (c) O\* formation; (d) OOH\* formation.

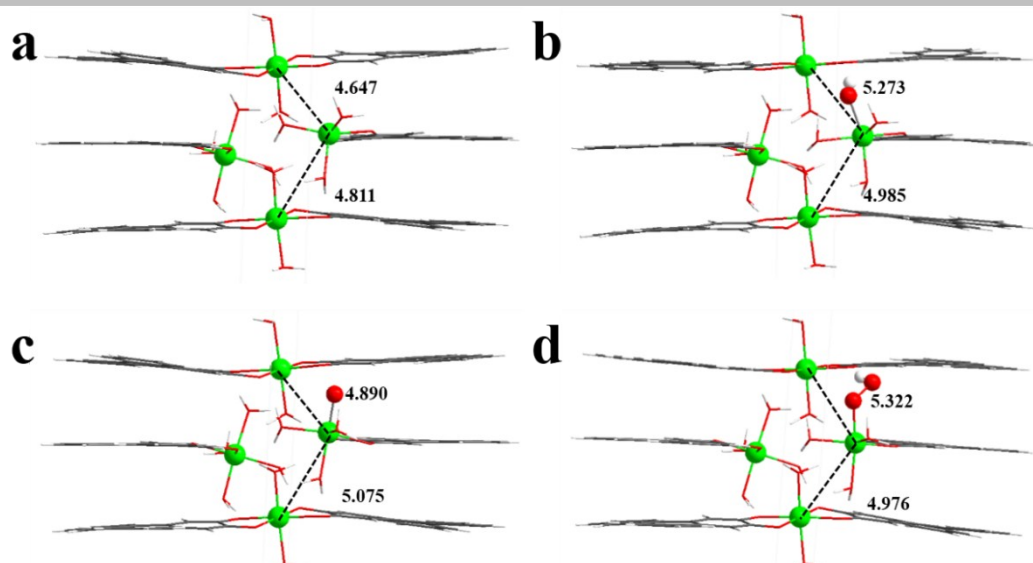

**Figure S29.** The relative distance of Ni active site and two neighbor layer Ni during different OER processes of (a) Fe\* vacancy formation; (b) OH\* absorption; (c) O\* formation; (d) OOH\* formation.

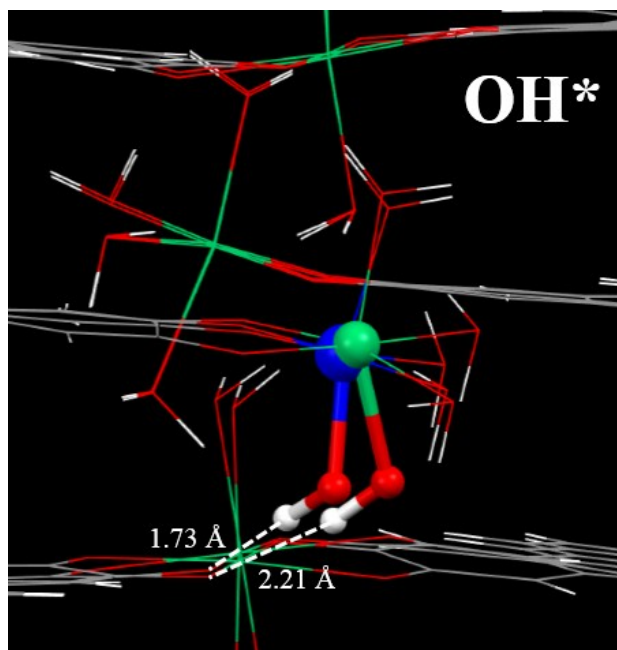

**Figure S30.** The overlap of Fe1Ni4-HHTP (Fe: blue atom) and Ni-HHTP (Ni: green atom) structures to show the different hydrogen bond distances between OH\* intermediate and neighbor O atom.

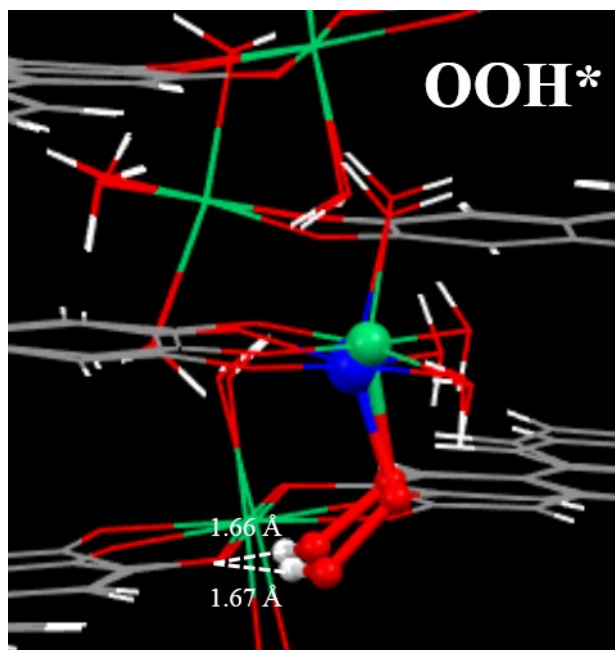

**Figure S31.** The overlap of Fe1Ni4-HHTP (Fe: blue atom) and Ni-HHTP (Ni: green atom) structures to show the different hydrogen bond distances between OOH\* intermediate and neighbor O atom.



---

## 2. Supplementary Tables

**Table S1.** ICP-OES results of Fe<sub>1</sub>Ni<sub>4</sub>-HHTP nanowires array

| Sample Information | Fe <sub>1</sub> Ni <sub>4</sub> -HHTP |
|--------------------|---------------------------------------|
| Elements           | Fe, Ni                                |
| Equipments         | ICP- OES spectrometer, Ultima 2       |
| Limit of detection | 0.5ppb                                |
| Results            | Fe/Ni = 0.665/10.05                   |

The inductively coupled plasma optical emission spectroscopy (ICP-OES) analysis reveal that 6.9% Ni was replaced by Fe in Fe<sub>1</sub>Ni<sub>4</sub>-HHTP nanowires.

**Table S2.** Comparison of the OER activity for the synthesized Fe1Ni4-HHTP nanowires array with several recently reported MOF OER electrocatalysts.

| Catalyst                                       | Overpotentials (V) | Current density (mA cm <sup>-2</sup> ) | Solution  | Substrate    | Reference        |
|------------------------------------------------|--------------------|----------------------------------------|-----------|--------------|------------------|
| <b>Fe1Ni4-HHTP NWs</b>                         | 0.210              | 10                                     | 1 M KOH   | Carbon cloth | <b>This work</b> |
| <b>NiCo-UMOFNs</b>                             | 0.189              | 10                                     | 1 M KOH   | Cu foam      | S1               |
| <b>MAF-X27-OH (Cu)-3</b>                       | 0.292              | 10                                     | 1 M KOH   | Cu foil      | S2               |
| <b>Fe<sub>3</sub>-Co<sub>2</sub>@GC</b>        | 0.283              | 10                                     | 0.1 M KOH | GC           | S3               |
| <b>2D Co-MOF</b>                               | 0.293              | 10                                     | 0.1 M KOH | GC           | S4               |
| <b>NNU-23</b>                                  | 0.365              | 10                                     | 0.1 M KOH | GC           | S5               |
| <b>A<sub>2.7</sub>B-MOF-FeCo<sub>1.6</sub></b> | 0.288              | 10                                     | 1 M KOH   | Ni foam      | S6               |

**Table S3.** Fitting parametres of Ni K-edge and Fe K-edge EXAFS curve for Ni-HHTP, Fe1Ni4-HHTP, Fe-HHTP, and their references are showed in the table S3..

| Sample          | Path   | C.N.           | R (Å)            | $\sigma^2 \times 10^3$ (Å <sup>2</sup> ) | $\Delta E$ (eV) | R factor |
|-----------------|--------|----------------|------------------|------------------------------------------|-----------------|----------|
| Ni foil         | Ni-Ni  | 12*            | $2.48 \pm 0.001$ | $6.2 \pm 0.1$                            | $0.8 \pm 0.1$   | 0.0003   |
| NiO             | Ni-O   | $7.9 \pm 1.0$  | $2.09 \pm 0.01$  | $6.7 \pm 1.7$                            | $-0.6 \pm 1.6$  | 0.006    |
|                 | Ni-Ni  | $16.7 \pm 1.3$ | $2.95 \pm 0.01$  | $6.9 \pm 0.6$                            | $-3.4 \pm 0.8$  |          |
| Ni-HHTP         | Ni-O   | $7.4 \pm 0.5$  | $2.05 \pm 0.01$  | $6.8 \pm 0.9$                            | $-4.2 \pm 0.8$  | 0.010    |
|                 | Ni-C   | $3.3 \pm 0.9$  | $2.80 \pm 0.03$  |                                          |                 |          |
| Fe1Ni4-HHTP     | Ni-O   | $7.3 \pm 0.5$  | $2.05 \pm 0.01$  | $6.9 \pm 0.9$                            | $-4.4 \pm 0.8$  | 0.008    |
|                 | Ni-C   | $2.8 \pm 0.9$  | $2.81 \pm 0.03$  |                                          |                 |          |
|                 |        |                |                  |                                          |                 |          |
| Fe foil         | Fe-Fe  | 8*             | $2.47 \pm 0.01$  | $5.1 \pm 0.7$                            | $6.4 \pm 1.3$   | 0.005    |
|                 |        | 6*             | $2.84 \pm 0.01$  | $6.3 \pm 1.3$                            | $5.7 \pm 2.4$   |          |
| FeO-1           | Fe-O   | $4.5 \pm 0.3$  | $2.12 \pm 0.01$  | $12.9 \pm 0.9$                           | $1.8 \pm 0.6$   | 0.008    |
|                 | Fe-Fe  | $10.1 \pm 0.9$ | $3.07 \pm 0.01$  |                                          |                 |          |
| $\alpha$ -Fe2O3 | Fe-O   | $8.1 \pm 1.6$  | $1.95 \pm 0.02$  | $13.2 \pm 2.6$                           | $-12.0 \pm 2.5$ | 0.011    |
| $\gamma$ -Fe2O3 | Fe-O   | $6.0 \pm 0.7$  | $1.93 \pm 0.01$  | $11.0 \pm 1.6$                           | $-5.8 \pm 1.6$  | 0.003    |
| Fe3O4           | Fe-O   | $4.7 \pm 0.5$  | $2.01 \pm 0.02$  | $10.7 \pm 1.1$                           | $-0.67 \pm 2.0$ | 0.012    |
|                 | Fe-Fe  | $4.2 \pm 0.7$  | $2.97 \pm 0.02$  |                                          |                 |          |
|                 | Fe-Fe  | $12.6 \pm 1.4$ | $3.47 \pm 0.01$  |                                          |                 |          |
| Fe-HHTP         | Fe-O   | $8.4 \pm 0.6$  | $2.00 \pm 0.01$  | $9.4 \pm 1.0$                            | $-2.6 \pm 0.7$  | 0.005    |
|                 | Fe-C   | $2.3 \pm 0.8$  | $2.84 \pm 0.04$  |                                          |                 |          |
| Fe1Ni4-HHTP     | Fe-O   | $7.9 \pm 0.8$  | $2.01 \pm 0.01$  | $6.9 \pm 1.2$                            | $0.9 \pm 1.1$   | 0.014    |
|                 | Fe-C   | $5.5 \pm 2.0$  | $2.78 \pm 0.03$  |                                          |                 |          |
|                 | Fe-C/O | $12.4 \pm 7.7$ | $3.03 \pm 0.02$  |                                          |                 |          |

\* The data for Fe foil and Ni foil was first fitted with the coordination number fixed to determine the amplitude reduction factor ( $S_0^2=0.77$  for Fe and  $S_0^2=0.83$  for Ni) for the fitting of other samples. The k range was set between 3 – 15 Å<sup>-1</sup>, R range of 1-3 Å. Independent CN and bond length were used for every shell, and the Debye-Waller factor and energy shift were shared for a dataset. A k weighting of 2 was used for all the fitting, and no parameters (CN, R,  $\sigma^2$ ,  $\Delta E_0$ ) was fixed.

**Table S4.** The distance between active site (Fe/Ni) and two neighbor layer Ni during four primitive steps of the OER process

|                             | <b>Ni-HHTP</b> |             | <b>Fe1Ni4-HHTP</b> |             |
|-----------------------------|----------------|-------------|--------------------|-------------|
|                             | A layer (Å)    | B layer (Å) | A layer (Å)        | B layer (Å) |
| <b>M<sub>vacancy</sub>*</b> | 4.647          | 4.855       | 4.610              | 4.855       |
| <b>OH*</b>                  | 5.273          | 4.985       | 4.860              | 4.999       |
| <b>O*</b>                   | 4.890          | 5.075       | 4.738              | 4.937       |
| <b>OOH*</b>                 | 5.322          | 4.976       | 4.815              | 5.119       |

---

### 3. References

- [S1] S. L. Zhao, Y. Wang, J. C. Dong, C. T. He, H. J. Yin, P. F. An, K. Zhao, X. F. Zhang, C. Gao, L. J. Zhang, J. W. Lv, J. X. Wang, J. Q. Zhang, A. M. Khattak, N. A. Khan, Z. X. Wei, J. Zhang, S. Q. Liu, H. J. Zhao, Z. Y. Tang, *Nat Energy* 2016, 1, 1-10
- [S2] Xue-Feng Lu, Pei-Qin Liao, Jia-Wei Wang, Jun-Xi Wu, Xun-Wei Chen, Chun-Ting He, Jie-Peng Zhang\*, Gao-Ren Li\*, and Xiao-Ming Chen, An Alkaline-Stable, Metal Hydroxide Mimicking Metal–Organic Framework for Efficient Electrocatalytic Oxygen Evolution. *J. Am. Chem. Soc.*, 2016, 138 (27), pp 8336–8339
- [S3] Jian-Qiang Shen, Pei-Qin Liao\*, Dong-Dong Zhou, Chun-Ting He, Jun-Xi Wu, Wei-Xiong Zhang, Jie-Peng Zhang\* , and Xiao-Ming Chen Modular and stepwise synthesis of a hybrid metal–organic framework for efficient electrocatalytic oxygen evolution. *J. Am. Chem. Soc.*, 2017, 139 (5), pp 1778–1781
- [S4] Zhu AX, Dou AN, Fang XD, Yang LB, Xu QQ. Chemical etching of a cobalt-based metal-organic framework for enhancing the electrocatalytic oxygen evolution reaction (vol 5, pg 24016, 2017) (Retraction of Vol 5, Pg 24016, 2017). *J Mater Chem A* 2017, 5(45): 24016-24016.
- [S5] Wang XL, Dong LZ, Qiao M, Tang YJ, Liu J, Li YF, et al. Exploring the Performance Improvement of the Oxygen Evolution Reaction in a Stable Bimetal-Organic Framework System. *Angew Chem Int Edit* 2018, 57(31): 9660-9664.
- [S6] Xue Z, Li Y, Zhang Y, Geng W, Jia B, Tang J, et al. Modulating Electronic Structure of Metal-Organic Framework for Efficient Electrocatalytic Oxygen Evolution. *Adv Energy Mater* 2018, 8(29): 1801564.

### Author Contributions

The contributions of authors to this work are as follows: Wen-Hua Li designed and performed synthesis experiments, characterization and data analysis. Jiangquan Lv performed the electrochemical properties measurements. Wen-Hua Li, Jiangquan Lv, Gang Xu and Yaobing Wang wrote the manuscript. Qiaohong Li helped with the DFT calculation. Jiafang Xie helped to analyze the electrochemical data. Yiyin Huang and Huijie Jiang performed partial synthesis work. Hiroshi Kitagawa and Naoki Ogiwara performed XAS measurements. Gang Xu and Yaobing Wang are in charge of the manuscript.
